# Supplementary material for: Pressure Sensitivity of SynGAP/PSD‐95 Condensates as a Model for Postsynaptic Densities and Its Biophysical and Neurological Ramifications
Source: PubMed Central journal article supplement (PMC7496680; doi:10.1002/chem.201905269), 2020-03-13
Supplement: CHEM-26-11024-s001.pdf [file CHEM-26-11024-s001.pdf]

# Chemistry–A European Journal

Supporting Information

## **Pressure Sensitivity of SynGAP/PSD-95 Condensates as a Model for Postsynaptic Densities and Its Biophysical and Neurological Ramifications**

Hasan Cinar,<sup>[a]</sup> Rosario Oliva,<sup>[a]</sup> Yi-Hsuan Lin,<sup>[b, c]</sup> Xudong Chen,<sup>[d]</sup> Mingjie Zhang,<sup>[d]</sup>  
Hue Sun Chan,<sup>\*[b]</sup> and Roland Winter<sup>\*[a]</sup>

## Additional Figures and Movies

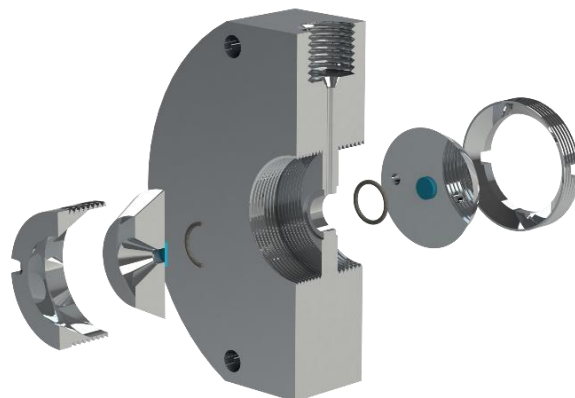

**Figure SI 1.** Schematic drawing of the home-built high-pressure cell for microscopy imaging. Pressure was generated hydrostatically by a high-pressure hand pump with water as pressure-transmitting fluid. Flat diamond windows were used as optical window material on both sides. The design fits to a standard inverted microscope with off-the-shelf long-distance microscope objectives.

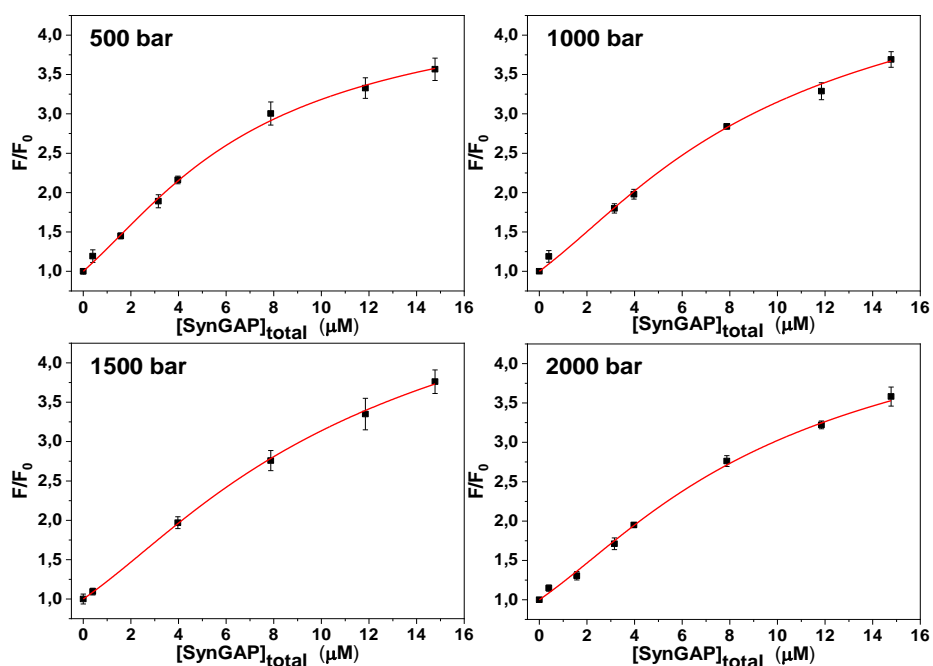

**Figure SI 2.** Binding isotherms obtained from the titration of PSD 95 labeled with Alexa 405 with SynGAP labeled with Alexa 488 at the hydrostatic pressures reported. The temperature was set at 25 °C.

**Movie 1.** Light microscopy data in the bulk phase of 90 μM human SynGAP/PSD-95 system (50 mM TRIS, 150 mM NaCl, pH 7.4) during pressure release at  $T = 25$  °C.

## Details of a Gelation-Type Model for SynGAP/PSD-95 phase separation

As discussed in the main-text, because of the structural specificity of SynGAP/PSD-95 binding,<sup>S1</sup> we construct a Semenov-Rubinstein-type gelation model<sup>S2</sup> with the following considerations: (i) For simplicity, the only polymer species in the model is a generic SynGAP/PSD-95 complex, which may be loosely identified with the one with a 3:2 stoichiometry that has been deduced experimentally.<sup>S3</sup> (ii) Because individual SynGAP and PSD-95 molecules are largely folded, the polymers in the model are taken to possess limited structural flexibility. Accordingly, each polymer consists of only a small number,  $N$ , of monomer units, with each monomer unit representing an essentially rigid section of the generic complex consisting of many amino acid residues. (iii) Let  $V$  be the volume of such a monomer unit in the model and  $V_p$  be the volume of the polymer representing the generic SynGAP/PSD-95 complex, it follows that  $V = V_p/N$ . (iv) Each polymer has  $f = 4$  “stickers”, which correspond roughly to the two PDZ3 and two GK domains<sup>S1</sup> in a 3:2 SynGAP/PSD-95 complex. For simplicity, we do not distinguish between these two different domains and treat all stickers equally. Under these assumptions, the free energy per unit volume in units of  $k_B T$ , where  $k_B$  is Boltzmann constant and  $T$  is absolute temperature, is given by<sup>S2</sup>

$$F_V(\phi, p) = (\phi/N) \ln(\phi) + (1 - \phi) \ln(1 - \phi) + (\phi f/N) \{r(\phi, p)/2 + \ln[1 - r(\phi, p)]\},$$

where  $\phi$  is protein (polymer) volume fraction,  $p$  is pressure in units of bar, and  $r(\phi, p)$  is the fraction of stickers that form pairs. Following ref. S2,

$$r(\phi, p) = 1 - \{[4\phi f \lambda(p)/N + 1]^{1/2} - 1\} / [2\phi f \lambda(p)/N],$$

where  $\lambda(p) = 1/[K_d(p)V]$  is the Boltzmann factor for the formation of a sticker pair, with  $K_d(p)$  being the pressure-dependent dissociation constants in Table 1 of the main text. The phase diagrams (coexistence curves) in Figure 7a of the main-text were obtained from the  $F_V(\phi, p)$  expression above using standard methods.<sup>S4</sup> By definition, the free energy  $F$  per polymer (protein complex) at pressure  $p$  is given by  $F(\phi)|_p = Nk_B T F_V(\phi, p)/\phi$ . In addition to the free energy profiles  $F_V(\phi, p) - \phi F_V(1, 1) = F_V(\phi, p) + 8.552\phi$  used in Figure 7b of the main-text (which applies the same subtraction  $\phi F_V(1, 1)$  to all  $p$ 's), we also considered  $F_V(\phi)|_p - \phi F_V(1)|_p - (1 - \phi)F_V(0)|_p$  (which has all  $p$ -dependent pure-phase contributions subtracted) and used the local minima and maxima along these alternate free energy profiles to obtain the slightly different estimates of  $\delta V_{\text{void}}/V_p$  provided by the dashed lines in Figure 7c of the main-text.

-----  
**S1.** M. Zeng, F. Ye, J. Xu, M. Zhang, PDZ ligand binding-induced conformational coupling of the PDZ-SH3-GK tandems in PSD-95 family MAGUKs. *J. Mol. Biol.* **430**, 69-86 (2018).

**S2.** A. N. Semenov, M. Rubinstein, Thermoreversible gelation in solutions of associative polymers. 1. Statics. *Macromolecules* **31**, 1373-1385 (1998).

**S3.** M. Zeng, Y. Shang, Y. Araki, T. Guo, R. L. Huganir, M. Zhang, Phase transition in postsynaptic densities underlies formation of synaptic complexes and synaptic plasticity. *Cell* **166**, 1163–1175 (2016).

**S4.** Y.-H. Lin, J. Song, J. D. Forman-Kay, H. S. Chan, Random-phase-approximation theory for sequence-dependent, biologically functional liquid-liquid phase separation of intrinsically disordered proteins. *J. Mol. Liq.* **228**, 176-193 (2017).
